# Supplementary material
Source: PubMed Central journal article supplement (PMC3497207)
Supplement: AAC.01431-12_zac999101408so1.pdf [file AAC.01431-12_zac999101408so1.pdf]

**Supplemental Table 1:** Summary of Study 2 treatment-related findings for animals sacrificed after 28 or 90 days of ring exposure. Microscopic findings were either reported as present (i.e., no adverse finding) or assigned a severity grade of minimal, slight, moderate, marked, or severe.

| <b>Treatment Duration</b> | <b>Site / Finding</b>                        | <b>Degree</b>              | <b>Control</b> | <b>Placebo IVR</b> | <b>TFV IVR</b> |
|---------------------------|----------------------------------------------|----------------------------|----------------|--------------------|----------------|
| 28 Days                   | Vagina /<br>Lymphocytic Infiltration         | Minimal                    | 2              | 1                  | 0              |
|                           |                                              | Slight                     | 1              | 4                  | 4              |
|                           |                                              | Moderate                   | 0              | 0                  | 1              |
|                           |                                              | Total                      | 3              | 5                  | 5              |
|                           |                                              | Number of tissues examined | 4              | 5                  | 5              |
| 90 Days                   | Uterine Cervix /<br>Lymphocytic Infiltration | Minimal                    | 2              | 1                  | 2              |
|                           |                                              | Slight                     | 0              | 0                  | 2              |
|                           |                                              | Moderate                   | 0              | 1                  | 0              |
|                           |                                              | Total                      | 2              | 2                  | 4              |
|                           |                                              | Number of tissues examined | 5              | 5                  | 5              |

**Supplemental Table 2:** Study 2 TFV vaginal fluid, vaginal tissue, and plasma concentrations from the TFV IVR.

| Collection Time and Location | Animal Number |        |        |        |        | Mean   | SD     |
|------------------------------|---------------|--------|--------|--------|--------|--------|--------|
|                              | 1             | 2      | 3      | 4      | 5      |        |        |
| <b>Vaginal fluid (ng/g)</b>  |               |        |        |        |        |        |        |
| Proximal, Day 28             | 5.8E+6        | 5.6E+6 | 9.6E+6 | 7.9E+6 | 4.8E+6 | 6.8E+6 | 2.0E+6 |
| Distal, Day 28               | 1.8E+6        | 1.3E+7 | 1.4E+6 | 4.4E+6 | 1.9E+6 | 4.6E+6 | 5.0E+6 |
| Proximal, Day 90             | 3.0E+6        | 1.7E+6 | 3.6E+5 | 1.6E+6 | 1.4E+6 | 1.6E+6 | 9.5E+5 |
| Distal, Day 90               | 3.3E+6        | 1.5E+6 | 2.1E+5 | 1.5E+6 | 1.3E+6 | 1.6E+6 | 1.1E+6 |
| <b>Vaginal tissue (ng/g)</b> |               |        |        |        |        |        |        |
| Proximal, Day 28             | 8.1E+4        | 4.7E+3 | 6.1E+3 | 7.6E+3 | 4.0E+3 | 2.1E+4 | 3.4E+4 |
| Distal, Day 28               | 6.7E+4        | 2.5E+4 | 9.2E+3 | 1.7E+4 | 4.5E+3 | 2.4E+4 | 2.5E+4 |
| Proximal, Day 90             | 7.8E+3        | 2.0E+3 | 1.4E+3 | 1.3E+3 | 1.7E+3 | 2.9E+3 | 2.8E+3 |
| Distal, Day 90               | 3.6E+3        | 1.4E+3 | 6.7E+2 | 5.5E+3 | 1.6E+3 | 2.5E+3 | 2.0E+3 |
| <b>Plasma (ng/mL)</b>        |               |        |        |        |        |        |        |
| Day 28                       | 23.8          | 18.0   | 29.4   | 24.0   | 31.7   | 25.4   | 5.4    |
| Day 90                       | 11.0          | 2.0    | *      | 8.1    | 15.6   | 7.3    | 6.4    |

\* BLQ<1.0 ng/mL
